# Supplementary material for: Coptisine Alleviates Pristane-Induced Lupus-Like Disease and Associated Kidney and Cardiovascular Complications in Mice
Source: Front Pharmacol. 2020 Jun 19;11:929. doi: 10.3389/fphar.2020.00929 (PMC7316987; doi:10.3389/fphar.2020.00929)
Supplement: Supplementary file 2 [file DataSheet_2.xlsx]

## Sheet: Fig 1
DNA-IgG		Control															Model															Coptisine 3 mg/kg															Coptisine 10 mg/kg
	1	118.169	73.4641	73.8123	85.6966	64.7134	62.0673	61.1157	45.564	74.8336	170.581	90.9191	62.3691	44.241	63.9475	65.7115	128.15	189.335	133.744	102.316	130.262	167.54	225.94	109.86	115.175	196.995	133.303		175.316	198.133	134.998	99.5073	154.565	118.03	235.689	169.49	150.015	211.874	122.951	92.8225	161.064	264.048	233.014	92.5671	118.169	145.396	77.1548	107.33	161.041
	2	67.9369		76.7539		71.4637	80.5551	81.7699		71.1502	66.4217	86.3286	66.0037	65.4159	51.9617	83.2459	95.224	124.026	144.325		96.6217	119.99	104.289	128.389	105.556	113.119	85.3097		98.5679	84.6436		120.003	128.507	90.1167			104.772		92.4156	96.7915	121.205	122.106	120.069	101.886	126.312		111.735
	3	51.8708	48.2576	55.4228	84.8795	56.9538	59.7709	85.4307	111.274	71.7128	66.8135	52.6057	110.968	54.0755	63.9965	97.3114	372.833	99.3936	84.6346					179.251	106.191	104.232	143.732	103.374		121.869	93.9431	79.6519	52.5218	70.8175	107.836	112.083	77.087	139.412	70.048	75.5197	68.6516	131.005	83.2141	58.3639	125.021	118.751	104.132		111.199
	4	69.6628	67.6341	75.905	105.961	69.4444	69.8189	93.5704	86.7976	78.558	70.7864	53.9949	76.2171	51.0923	51.6853	69.538		171.286	143.882	149.469	136.798	172.066	171.411	185.705	122.503	143.477	109.238	91.136		110.924	133.708	96.3794	130.368	120.88	193.165	169.507	113.982	164.107	74.4069	102.934	120.287	121.598	97.0348	81.4293	91.6665	71.7228	88.3582	135.393	83.2708
	5	180.048	94.3774	41.1004	75.195	64.7864	80.2992	73.9606	106.154	95.4449	44.7033	43.0019	89.3065	30.6918	31.5258	45.2037	215.543	119.264	134.71	73.1266	90.0738	128.806	120.032	135.911	81.767	88.5392	74.9948	76.0957	394.79	123.401	95.5116	101.383	118.631	74.0941	125.536	127.004	85.3033	70.4578	92.1422	113.76	113.693	100.949	121.066	119.365	110.524	105.353	76.3626	147.054	99.6817
	6	61.2155	69.2294	67.9599	57.1688	88.2328	52.9635	79.4254	92.2001	92.3985	68.1186	93.1126	77.8385				145.111	124.007	142.836	112.317	138.911	128.472	124.405	158.536	159.389	157.796	170.794	102.107				95.8495	128.728	119.371		136.237	93.6595		140.76	120.964	127.591	154.554	124.064				124.377	113.683	89.5354
DNA-IgM		Control															Model															Coptisine 3 mg/kg															Coptisine 10 mg/kg
	1	111.855	20.5504	0.551689	10.2063	14.6198				121.372		102.614	175.161	111.028	100.683	31.3084	39.8871		125.013	19.0885	186.195		239.543	140.901	196.677	105.593	75.6366		371.839		168.596	62.8374	125.013	66.5889	532.38	148.625	98.3662	576.35	144.377	50.8657	359.15	264.976	195.519	118.117	79.3881	171.575	85.8428	122.696	357.053
	2	72.1408	77.6687	66.721		75.754	69.7011	73.7004	64.6519		74.843	79.3209		64.3739	44.1924	80.9268	81.8687	147.354	140.885		69.593	128.331	98.3289	130.199		106.049	72.743	86.7172	88.5084	76.2636		111.068	120.147	98.1591			88.0143		90.0679	70.257	97.8194	105.061	112.334	86.918	113.121		86.115
	3	60.2201	54.9126	56.3415	106.219	60.152	54.9806	97.8491	56.2054		64.7791	48.2441			88.5269	96.2161	89.4115	94.4469	91.589				107.444	132.144	97.4409	148.475	122.005	81.5863	221.555	123.774	117.378	103.429	50.2855	72.4682	117.582	148.747	73.625	128.333	55.525	72.6043	52.1227	121.665	92.4055				81.11	116.834	103.497
	4	62.4748	56.1236	68.6742	102.733	63.7653	63.74	76.7967	55.491	88.993	58.5021	55.6934	91.321	92.9151	73.6337	73.7602	117.283	114.727	101.139	100.557	97.3939	124.621	122.925	176.291	115.916	126.442	106.073	92.4596	122.116	117.105	115.84	81.0224	106.351	88.0062	116.473	142.536	84.9698	153.34	64.8027	74.0133	109.388	103.467	76.8473	69.9394	100.531	72.0902	67.4596	70.1924	62.0193
	5	73.8203	64.2927	74.1204	74.308	65.418	56.4531	68.4564	92.4255	92.0879	85.8237	38.7857	105.967	43.662	43.6995	73.6703		130.198	80.0471			87.2866	88.2243	172.698	118.458	119.095	87.9993	84.0982	145.127	125.284	107.055	101.615	123.897	91.1876	112.344	121.683	70.9696	105.404	109.343	107.467	142.427	87.3616	125.697	132.411	111.181	89.3871	56.0029	108.968	101.466
	6	66.4577	72.0496	67.318	91.3346	37.7812	90.3667	102.662	66.9954	58.8585	63.6618	89.6498	70.6875				127.933	128.793	122.341	123.811	93.4495	140.013	110.261	107.609	97.1057	103.271	143.669	106.139	183.135	150.802		121.122	151.232	133.31	158.939		88.3952	159.119	118.685	114.742	106.963		99.83				104.203	127.897	108.361
Sm-IgG		Control															Model															Coptisine 3 mg/kg															Coptisine 10 mg/kg
	1	57.3734	63.7369	38.6377	54.762	80.5205		70.785	76.9457			54.0775	56.9677	64.5736	78.1373	82.2269	168.926	87.1629	89.7235	89.6982	102.501	90.1799	100.499	75.1203	91.0165	110.64	114.24	130.972	241.232	103.896	101.868	92.3856	65.7905	200.312	106.963	88.4813	121.288	158.075	112.465	87.1629	142.052	128.97	136.576	142.863	173.033	127.525	102.958	85.2868	101.259
	2	76.5995	73.3223	62.5252	80.407		67.475	80.2846	73.703			77.2794	79.8767	59.5743	78.8432	51.8777	155.171	131.754	134.814	108.963	102.45	107.032	145.897	212.161	119.788	162.527			78.3672		119.312	113.56	135.167	153.349	183.686	116.946	104.245	150.03	83.453	81.2229	87.6277	94.7532	97.133	84.5001	102.328	123.867	141.124	125.513	154.205
	3	45.1408	51.0684	58.8483	69.0791		57.3949		67.0558	85.6934	65.5169	75.2062	71.245	55.9985	77.0301		181.504	78.6829	96.7792	97.3206	101.31	122.085		156.141	119.207	128.668		70.561	117.611		72.5274	79.6519	52.5218	70.8175	107.836	112.083	77.087	139.412	70.048	75.5197	68.6516	131.005	83.2141	58.3639	125.021	118.751	104.132		111.199
	4	74.6647	75.2227	64.3132	85.072	71.4002	66.7127	85.2394	50.753	76.4504	53.6827	47.0421	65.8199	68.2473	69.2797	86.0485	119.056	90.0943	154.714	66.7127	95.8978	103.654	83.7885	103.989	151.227	139.843	145.507	135.1	133.9	123.409	143.944	86.2438	99.5808	98.1578	122.153	86.2996	102.259	72.6278	47.0421	65.8199	68.2473	69.2797	86.0485	86.2438	76.0597		69.3355	98.967	68.3589
	5	66.3298		38.2616		74.6391	67.2477	57.5857	60.0495	65.6535		47.9719	74.3976	58.7451	95.799	72.1753	149.182	84.4944	75.5087	95.6057	78.4073	160.535	136.814	144.979	112.466	114.302	140.534	85.0258				57.9238	109.278	109.519	135.896	90.4365	86.0886	98.9391	58.89	60.0012	71.9338	48.1169	47.7787	59.4698	74.929	76.6682	80.1948	81.789	145.558
	6	68.1017	59.4214	76.2122	60.2593	69.4088	62.5048	81.2729	64.3816	68.2693	61.5328	50.9422	65.32				131.142	119.169	120.499	104.791	162.507	116.943	109.831	99.8531	148.769	135.261	78.3628	145.341				95.376	111.647	117.941	164.887	107.196	83.9912	96.5528	90.1825	92.4082	87.4706	72.7088	84.0424				114.564	109.498	88.1102
Sm-IgM		Control															Model															Coptisine 3 mg/kg															Coptisine 10 mg/kg
	1	69.5899	54.2519	57.3051	73.6908	41.0999	82.489	48.796	31.796	78.7312	102.994	53.8906	64.9289	63.3933	54.6855	107.366	149.134	159.504	81.7663	73.6728	86.5357	66.6632	72.7695	74.8471	69.355	88.4868	67.982	202.194	162.431	80.3572	99.5793	63.7365	95.2977	133.055	172.276	64.947	103.427	113.58	81.8205	70.999	145.972	37.017	88.9746	93.8524	122.92	104.746	97.2669	80.4836	81.3508
	2	66.0327	55.3548	51.4768	65.0588	72.6732	54.1507	61.6057	53.6549	57.2673	61.712	70.3534	88.7165	59.587	117.527	54.2392	152.766	108.443	122.84	108.532	81.35	83.1208	121.069	182.374	80.5532	119.298				70.3003	121.565	77.1532	96.8976	159.424	161.142	107.451	87.5655	120.024	66.1921	76.6574	74.8689	93.9581	99.6777				108.585	100.404	110.515
	3		54.4083	56.9437	59.5819	72.533	58.4855	45.5344	71.7449	73.6294	76.0277	82.1606	88.7732	73.9377			89.8011	115.292	60.4384		67.4622			115.977	80.0364	96.2424	67.6677	81.9893	129.168	83.8737	75.4795	62.9738	44.0269	58.1086	66.3315	67.3936	60.4727	89.3557	59.993	68.1817	58.8966	67.9418	75.4795	53.3804	102.924	81.7495	56.2242	70.4087	73.321
	4	51.9209	61.6526	60.6197	69.9165	73.2601	60.7284	64.8603	61.4623	78.8055	72.1184	66.6544	67.1166	64.371	75.4076	79.757	115.966	84.8947	94.4362	87.8577	89.3528	98.5681	114.552	139.833	112.242	137.115	88.7548	82.8287	126.594	76.1415	94.4634	69.699	76.6037	77.7997	79.7026	79.5939	94.3818	74.8911	69.8349	82.2579	81.3064	102.048	66.0836	76.658	107.43	99.6826	66.0836	69.2641	64.5069
	5	61.4528	48.9177	42.1303	49.2234	80.2861	63.7152	57.1725	66.4057	85.7282	78.8186	63.1038		80.8976	87.6849		130.121	92.4544	67.8732	55.2158	102.055	79.6746	87.9906	106.09	101.993	118.686	77.2899	86.2785	196.588	125.596	109.086	77.4122	113.305	144.735	108.719	106.946	62.5534	70.9306	74.2937	77.0453	87.318	77.1676	55.3992	62.0031	108.536	95.3894	65.6719	83.9549	76.8007
	6	58.9362	47.8648	77.6674	47.7979	64.2211	52.3469	69.6063	64.4218	92.7861	60.4079	70.2418	70.4425				123.358	116.066	118.709		76.597	130.75	122.656	83.7884	84.9591	66.7297	135.633	125.699	95.4285	75.0584	152.492	80.7112	99.7434	110.012		89.9095	69.6732	117.471	90.3109	96.432	84.1564	84.4908	103.356				101.315	101.683	75.5267
Histone-IgG		Control															Model															Coptisine 3 mg/kg															Coptisine 10 mg/kg
	1	68.8961	69.7767	65.2689	66.6736	79.6519	74.0958	68.959	70.217	77.115	74.2845	65.1011	69.2735	65.2479	62.8368	66.5269	84.4952	75.5005	82.734	80.0922	89.9884	76.444	92.8818	88.6885	84.5371	74.3474	82.1889	89.0659	81.6437	87.724	83.6775	72.6072	70.846	81.455	104.433	75.836	78.8762	90.1981	87.3047	73.8651	84.5371	71.6637					79.1278	80.0083	86.6128
	2	67.1598	77.744	61.5057	72.745		89.9142	57.472	76.5029			62.8158	73.5034	58.2994	62.3331	79.8816	108.842		90.6381	82.6741	88.018	170.864	163.797	90.2589		105.153		135.664	170.933	164.624	240.541	162.418	161.383	185.345	132.182	181.759	135.147		72.8829	73.6069	124.873	98.5677	117.909	70.573	112.91	103.808
	3	61.8393	58.2713	56.404	71.9096		68.325		58.8382	83.7306	84.1474	60.4721		54.2532	63.023	76.8448	131.815	135.016	110.357	87.3486	93.8676	104.922	117.643	160.909	120.644	154.223			148.588		106.722	102.237	84.3975	141.535	161.642	107.356	108.706	130.714	71.026	73.9937	79.1123	86.2815	69.9256	66.3076	117.693	80.4627	109.773	120.061	121.978
	4	81.5991	46.5647	57.9549	61.1993	68.4116	60.8025	86.7107	67.0811	79.9652	63.8835	66.8944	62.0396	65.3306	67.3379	82.7428	108.278	111.802	98.2643	122.072	93.3161	66.9644	73.2431	81.1789	79.3117	102.349	106.27	81.9959	150.548	89.6516	108.581	88.7647	82.5093	83.6064	147.677	96.7472	116.167	96.257	92.7559	96.4904	101.159	99.9682	62.7631	78.4247	83.2562	74.8536	82.8828	121.115	64.6304
	5	113.221	83.7093	50.3569	50.6602	70.0146	66.9573	126.36	76.8872	81.511	51.974	45.152	70.5705	60.9438	49.2957	40.4523	92.4516	153.724	93.0327		78.8328	70.9242	112.034			86.0338	96.6206	67.7153	139.549	102.584	114.636	106.399	128.482	91.7694	140.383	85.8064	103.62	90.1523	76.584	102.457	160.319	118.578	115.242	93.5886	87.4488	69.9893	97.8587	154.002	114.788
	6	60.5443	83.0178	55.96	136.422	56.3288	72.084	53.9313	54.8271	59.3323	59.8329	51.7709	95.8749				136.969	138.009	209.568	89.4942	74.022	131.787	86.6114	116.753	61.1772	125.566	129.306	95.1685				156.583	86.9033	115.512	79.4409	98.1973	135.327	83.5644	110.002	117.246	143.464	78.8936	59.3891				82.7069	78.5834	90.6801
Histone-IgM		Control															Model															Coptisine 3 mg/kg															Coptisine 10 mg/kg
	1	54.9815	51.8774	58.0855	83.5604	55.8021	59.2629	57.8358	51.4136	73.0708	84.9519	65.3641	62.7595	65.6495	85.7011	59.7625	59.2273	109.856	83.6318	88.5198	69.2888	59.2986	81.0629	91.16	81.2056	87.3781	103.79	81.3483	111.461	114.994	91.1244	85.7011	81.7051	98.7954	61.7962	109.57	93.5149	73.3919	58.9775	103.184	94.4069	60.7972	72.3572				70.4662	77.6377	95.3702
	2	68.9681	59.8355	54.9485	62.8288		76.6347	63.1037	82.1631	69.7318		56.5673	68.6627	63.6535	57.392		103.758	182.989	90.8987		95.2665		108.278	107.667	89.9213	153.697	88.1192		90.5932	85.7978	98.5652	143.343	141.418	143.159	101.222	123.519	86.9891	185.218	84.851	113.684	140.471	92.3648	139.097				110.722	127.399
	3	57.6204	38.6944	42.4945	55.2242	77.5385	48.9155		63.8729	91.822		65.7074		58.7249	68.5716	84.0905	71.3047	101.65	85.2512	97.0448	65.0522		92.1963	67.2986	67.0927	120.07	62.6935			69.9007	75.2921	82.1062	62.394	83.0984	85.064	62.7871	59.9604	76.4153		48.5973	63.1802	62.7871	48.8594				54.8685	120.52	108.221
	4	72.7446	65.3979	66.3247	76.5198	83.0302	60.176	96.2996	63.1147	68.0427	60.8541	53.3943	66.1212	61.1706	65.3526	69.9416	88.1842	107.399	89.6762	85.6524	94.3782	93.1575	106.382	86.4888	78.2378	97.7916	82.3972	70.145	105.274	71.0266	89.5632	82.8945	78.0796	68.54	78.7351	71.1171	85.8559	68.8113	60.6733	62.7982	77.6274	72.8351	59.8143	67.681	79.6167	64.6971	60.4246	81.8773	66.5281
	5	69.0349	81.801	62.6715	62.809	81.5653	71.7649	72.9629	75.634	63.9678	52.3016		72.1577	59.8041	58.9006	68.701	152.171	132.708	77.2641		55.8171	64.8909	87.7912	83.6864	76.891	95.2348	67.4637	68.9564	49.1984		73.1593	70.6258	83.274	47.2933	63.0643	43.2867	50.475	74.9859	38.5928	53.5782	102.894	77.4409	63.8303	66.6388	79.2281	73.4736	65.7157	101.147	97.6309
	6	56.139	66.3963	64.8829	47.347	52.1994	59.43	57.4362	78.7195	45.7856	57.4602	48.5962	119.965				122.385	67.8446	143.081	65.1021	64.7908	87.8985	81.0518	149.344	77.5506	149.324	116.802	108.38				132.655	56.816	64.5185	50.5139	60.7062	61.2897	93.8699	104.296	110.636	96.7875	71.268	51.8755				66.3858	62.6318	124.525
total IgG		Control															Model															Coptisine 3 mg/kg															Coptisine 10 mg/kg
	1		1.20057	1.30227	1.29886				1.04943	1.07102	0.915909	1.0375	0.914773	1.04148	1.11648			1.0267	1.725	1.09261	1.08011		1.11515	1.11515	1.58061	1.08364	1.82667					1.99148	1.3483	1.05568	1.59375	1.31534	1.11875	1.37557	1.33939	2.17515	1.80303	2.47212	2.10788	1.03333			1.53807	2.16818	1.23693
	2	1.66562	0.980208	0.576042	1.10312	1.09375	1.49271	0.446875	1.83178	0.546512	1.1031	0.458139	0.503876	0.8144	0.7272	0.048	3.13854	2.16771	2.64583		3.13229	2.1	3.24896	2.51938	2.17209	2.35659		2.17597	2.632	2.9184	2.6496	2.90417	3.33125	1.99687	2.12188	2.13542	2.42604		3.2969	4.05581	2.07209	2.34961	3.39302	2.55814	2.5096	2.6224	2.76458	2.23542	3.27708
	3	1.35865	1.47981	1.2476	1.48173	1.12692	1.74327	1.32596	0.775961	1.27548	0.773558	0.511682	0.230374	0.749533	0.804206	1.22056	2.24808	2.70096	2.99615	2.63558	2.9	2.43077	3.51346	3.92019	3.15096	3.775	3.48037	3.64019	5.25981	2.4	2.83178	2.64327	1.07211	2.05096	2.99808	3.57212	3.78077	3.24615	3.67944	4.59439	2.0514	4.5514	2.93271	3	2.98182	2.96364	3.13173	2.88654	3.07596
	4	1.51275	1.01275	0.919608	0.804902	1.0598	1.42745	2.62059	1.13922	1.47843	0.901961	1.14309	0.531707	1.0561	1.05041	1.44553	3.84235	3.38235	3.48588	2.95529	2.86	2.80353	3.87647	3.68588	2.73529	3.91882	3.13951	3.02732	4.26244	2.97073	3.50439	2.46776	2.37459	1.62635	2.79247	3.34447	2.62244	3.4279	3.06966	3.6878	2.60254	2.51356	2.08156	2.72759	2.37442	3.34712	3.02965	2.22353	2.16706
	5	1.52766	0.494326	0.512766	0.647518	0.598582	1.11915	2.5156	1.19645	0.144681	1.43901						3.53404	3.64965	3.48085	2.8766	3.02624	3.22199	4.30213	3.73333	3.75106	3.51348						2.45904	2.09787	2.10638	2.54096	2.66117	2.54521	2.39521	2.98351	2.73989							2.36117	2.14521	2.10319
	6	0.950933	0.542933	0.440533	0.700267	0.576533	1.20373	0.882667	0.860267	2.56533	1.85493						3.38987	3.30133	3.1936	3.0208	3.37973	2.88693	3.19627	3.2768	3.59147	3.192						3.28	2.25227	3.0416	2.89547	3.32267	3.11253	2.86507	2.6928	2.85387									3.07307
ICAM	control	model	3	10	30
	20900	64550	57575	50100	48566.7
	19433.3	61750	40966.7	60475	53766.7
	19850	53966.7	57725	35700	35733.3
	20633.3	48833.3	47433.3	47933.3	52266.7
	21683.3	59950	52800	37366.7	43600
	34233.3	57600	43933.3	67650	36866.7
	20700	80700	63650	57433.3	46100
	19083.3	70025	54600	52300
	25333.3	81550	62375	40566.7	48466.7
	19216.7	67225	66425	67875	44600
IL-17A	0	53.8503	0.160428	11.6578	7.96791
	0	39.1444	8.23529	1.06952	14.4385
	0	3.68984	3.85027	7.64706	5.50802
	0	79.7403	64.7059	9.51872	0
	0	5.61497	9.7861	26.6845	9.94652
	0	103.896	2.40642	21.6043	0
	0	6.04278	30.2674	8.34225	9.73262
			28.6631
MCP-1	46.6667	2532	310	2744	1222.5
	0	3193	1597.14	1427.14	3698
	0	1220	1762.86	2071.43	2278.57
	770	2078.57	2865	1552.86	2231.43
	30	2692	4218	133.333	3441
	42.2222	3224	52.2222	2592	12.2222
	146.667	1237.5	1958.57	1588.57	170
			2762	3208	1165
[truncated: 27 more columns]

## Sheet: Fig 2
control	model	3	10	30
4.08989	7.22979	7.16667	6.61509	7.04615
3.55036	8.53307	7.9205	6.47877	4.96774
4.68992	8.21552	8.3444	6.29286	5.57463
4.10623	5.60905	8.33178	5.53846	4.15385
3.78455	8.22936	10.2416	5.2625	5.77606
4.67681	12.1947	6.26984	7.78626	7.31641
3.87986	7.29091	5.66372	7.2487	5.13546
4.72385	8.36475	6.36122	4.3431	6.40942
3.20072	7.30493	6.21852	7.32599	6.47431
3.93991	8.08974	6.8189	7.51163	7.80509
4.7384	7.76378	7.21569	7.06299	6.06818
5.54839	6.25292	7.67717	5.20238	5.38938

## Sheet: Fig 3
protein/creatinine	control	model	3	10	30
	2.75798	14.1754	5.78622	6.30699	2.12172
	5.1693	5.29432	3.32217		0.784783
	6.63281	11.2065	13.3292		1.68996
	4.19269	7.46893	5.63666	2.92544	12.0366
	1.06621	12.5918	3.57014	5.32353	7.00755
	1.98118	7.2221	9.09425	1.90561	5.05277
	1.15793	10.7517	8.35509	5.95024	3.03193
	2.46749	3.30649	7.88518	3.14215	4.23101
IgG	189.103	5303.57	2509.68	848.844	1385.29
	154.167	8575.64	549.182	2749.95	2718.63
	105.361	2287.73	1745.77	3257.8	1951.66
	93.7732	4399.85	6886.26	765.595	1319.87
	125.387	1359.01	1204.2	2208.08	3190.74
	332.729	1487.27	3255.84	4545.89	2599.94
	259.483	1376.75	2001.55	3586.11	403.541
	418.854	2298.38	2450.58	1562.2	1037.67
	318.971	2647.7	1408.34	1157.51	940.235
C3	89.0388	232.2	273.687	230.629	108.254
	76.3438	183.433	387.516	151.286	146.037
	38.8649	253.548	81.7697	200.207	107.689
	91.4931	249.016	87.2102	123.738	197.593
	124.811	474.322	283.473	322.159	111.803
	72.6701	445.357	166.684	324.024	138.762
	76.6524	509.732	139.567	347.457	261.445
	74.2394	265.307	420.144	153.108	105.804
	82.3846	205.185	262.871	194.12	116.663

## Sheet: Fig 4
IL-6	control	model	3	10	30
	1.48352	6.34615	7.15385	7.84615	0.362637
	1.53297	103.77	9.1978	8.42308	2.45604
	1.87912	10.0385	66.2261	4.6978	8.67033
	0.362637	6.54396	5.10989	4.36813	1.84615
	0.379121	6.74176	3.13187	32.9126	0.494505
	0.362637	11.7363	8.02747	4.36813	2.93407
TNF-α	0.71778	10.6896	1.0715	1.41016	0.849483
	1.03857	10.6954	1.18438	1.22013	1.40828
	1.05927	1.08561	0.920978	1.47413	1.13829
	1.33772	11.0523	1.26717	6.95373	0.981185
	0.988711	7.31638	1.58326	1.27281	5.81972
	0.857949	16.8087	16.6072	1.62371	0.789276
IL-17A	1.07059	4.28235	0.647059	13.0238
	0.847059	5.03529	0.988235	2.4
	0.870588	2.88235	3.96471	1.23529	0.2
	1.38824	4.41176	2.76471	2.15294	1.97647
	0.823529	20.4769	1.16471	2.15294	2.50588
		4.27059	21.9523	0.835294	5.62353
MCP-1	0.772809	8.42934	7.95707	6.7263	6.16816
	0.805009	6.51163	1.63149	6.74776	2.33989
	2.01789	9.98211	8.08587	8.16458	8.03578
	1.03041	2.03936	0.778175	1.18068	1.63149
	0.826476	8.16458	6.55456	8.43649	5.9034
	0.547406	4.72272	6.67621	9.0805	0.0858676

## Sheet: Fig 5
ERM	control	model	3	10	30
	0.759843	0.687135	0.671878	0.740267	1.00835
	1.41929	0.6137	0.732331	0.825869	0.884422
	0.73069	0.54378	0.657007	0.73318	0.698902
	1.03977	0.651258	0.620204	0.62341	0.804895
	1.24572	0.527676	0.628582	0.777367	0.656133
	0.804679	0.642167	0.629381	0.65075	0.766231
P-ERM	0.811503	1.25317	1.01252	0.95309	1.07919
	1.03672	2.29894	2.5471	1.46909	1.50748
	1.10646	1.47686	1.50519	1.1188	0.813538
	0.84606	1.80489	1.78882	1.95911	1.52348
	1.05166	1.49926	1.23605	1.09301	0.926623
	1.14759	1.55209	1.77688	1.39857	1.2879
ROCK1	0.927904	1.26556	1.40381	1.6798	1.18054
	1.05765	1.43298	1.72377	1.28546	0.987722
	0.991901	2.00852	1.53079	1.24679	1.20664
	1.07986	1.69534	1.93735	0.971624	0.985402
	0.994002	1.3251	1.55799	1.72131	1.55609
	0.948685	1.55853	1.21991	1.18488	1.26648
ROCK2	0.821707	1.43611	1.59419	1.21915	1.22361
	1.13806	1.77459	1.0723	1.27829	1.50666
	0.95063	1.82655	0.630829	1.58017	0.812433
	1.47536	1.85971	1.92195	1.14748	1.00009
	1.04423	1.53727	1.91509	1.74724	1.97667
	0.570008	1.25629	2.13748	1.63872	1.41706
P-IKK	1.22069	2.0305	1.88825	1.4641	1.59058
	0.888075	1.8712	1.60878	1.86916	1.79259
	0.845805	1.65602	1.61769	1.66732	1.37535
	0.898423	1.59021	1.65273	1.51734	1.30512
	0.992591	2.40111	2.31972	1.99482	1.67118
	1.15442	2.5154	2.45145	1.90037	2.18795
P-P65	1.21348	1.71653	1.35895	1.32283	1.04087
	0.981841	1.54718	1.27685	0.909469	0.778359
	1.03038	1.37319	1.49556	1.42449	1.34478
	0.762762	1.54112	1.16681	0.856424	0.913395
	1.01153	1.27137	1.08102	1.12618	1.11084

## Sheet: Fig 6
MBP		Control										Model										Coptisine 3 mg/kg										Coptisine 10 mg/kg										Coptisine 30 mg/kg
	2	76.25	86.6667	81.25	63.3333	82	88.75	82	88.3333			94		94.25		105.333	85.75	87	93	90.3333	88	93	90.6667	89.3333	87.75		84	86	94			81.5	79	84.6667		88.3333		82.6667	74.5	87		86.3333	83	87			93	78	73.5
	4	87.5	89	84.6667		85	75	84		67.5			102	87.5	93.6667		94.6667	94.5	87.3333		108	81.3333	85	96	93.5	106		83.75		86.75		76.3333	88.6667	87	91.3333	97		88.3333		80.3333		85.25	85		74.6667	82.6667		81.6667	87.3333
	6	69.6667	65.5	73	84	75.6667	83	76				84.5	100	93	88.25	92.25	101.667					80	80.25	89.75	77.25	87.5	83.75	86.75				73.5	65.5	79	87	80	75.3333					61	82.5	80.75	73.75	65.6667	75.5
SBP		Control										Model										Coptisine 3 mg/kg										Coptisine 10 mg/kg										Coptisine 30 mg/kg
	2	103.75	102.333	109.25	113.667	94	105.5	107	107.667			108	142.333	108.5	113	153.333	101.25	118.667	115.5	107	106	118.667	124.333	120.667	110	112.5	107.333	107				103	100.25	119		110.667		110	111	118		103.333	109.667	118.25	99.5	90.25	105.667	107
	4	114.5	108.5	112	104.5	114		109.5		111.5		135.333	113.5	123	116	118.333		112.333		125.5		110	104.667	118	117	122.25		108.667		110		97.6667	110.667	116.5		116.25		112	103.667	99		108.5	112	98	101.667	110.333	109.667	107.75
	6	102	93.25	99	109.5	127.667	106	106				105.5	135	111	116.75	132.5	132.333					98.25	104.5	132.5	109.25	108.5	108.667	110				92	93.25	108.667	111	111.5	115.333					94.6667	105	107.5	94.5	100.667	111.5
		Control										Model										Coptisine 3 mg/kg										Coptisine 10 mg/kg										Coptisine 30 mg/kg
DBP	2	62.5	68.6667	68.75	73.3333	76.25	60.5	70	68.6667			87	80.6667	87.5	72	81.3333	78.25		82	81.6667	79	80.3333	74.3333	80.6667	79	75.5	72.3333	75.3333				70.75	73	67	76.5	77.6667	72	68.6667				77.3333	69.6667	71.5	67.25	65.5	86.6667
	4	63.3333	69	71	60.5	70.5		71				85.3333	74.5	79	84	83		75		99.5		71.3333	78.6667	85.3333	76.75	72.6667		72.6667		75.5		65.3333	78	72.25	81	87.5	81			71.3333		73.25	75	69	71.3333		63	79	71.6667
	6	52	61.75	60	71	59.6667	71.75	61.3333				75	83	84.5	74	73.5	89					71.25	68.5	68.5	61.25	77.25	72.6667	75.5				64.25	51.75	64.3333	75.5	66.5	55					44.3333	71.25	62.75	68.25	48	58
PE		Control						Model						Coptisine 3mg/kg						Coptisine 10mg/kg						Coptisine 30mg/kg
	-4	1.03	1.01	1.01	1.04	0.99	1.01	1.02	1	1.03	1.02	1	1	1.01	1.02	1.01	1	1	1.03	1.01	1.02	1.01	1	1.03	1.01	1.01	1.02	1.01	1	1.04	1.06
	-3	1.03	1.01	1.03	1.05	1.01	1.01	1	1	1.03	1.05	1	1.02	1.01	1	1.01	1	1.02	1.04	1.01	1	1.01	1.01	1.03	1.01	1.01	1	1.01	1.02	1.04	1.06
	-2	1.03	1.02	1.05	1.05	1.02	1.05	1.01	1.16	1.03	1.06	1	1	1.02	1.03	1.04	1	1.02	1.04	1.02	1.03	1.04	1.03	1.06	1.03	1.02	1.03	1.04	1.02	1.06	1.07
	-1	1.32	1.32	1.5	1.21	1.45	1.53	1.27	1.6	1.19	1.45	1.35	1.27	1.29	1.36	1.38	1.21	1.33	1.33	1.29	1.36	1.38	1.36	1.48	1.46	1.29	1.36	1.38	1.17	1.38	1.38
	0	1.47	1.46	1.65	1.38	1.6	1.66	1.45	1.76	1.31	1.56	1.5	1.44	1.41	1.5	1.53	1.38	1.48	1.5	1.54	1.37	1.44	1.5	1.62	1.61	1.42	1.4	1.27	1.34	1.57	1.46
	1	1.51	1.51	1.71	1.48	1.66	1.7	1.52	1.83	1.35	1.62	1.57	1.5	1.44	1.59	1.6	1.44	1.55	1.56	1.59	1.42	1.51	1.58	1.67	1.66	1.44	1.43	1.34	1.4	1.64	1.49
	2	1.58	1.5	1.74	1.49	1.66	1.7	1.53	1.85	1.39	1.62	1.58	1.51	1.46	1.8	1.6	1.41	1.56	1.58	1.63	1.43	1.54	1.58	1.66	1.68	1.45	1.46	1.35	1.4	1.65	1.49
Ach		Control						Model						Coptisine 3mg/kg						Coptisine 10mg/kg						Coptisine 30mg/kg
	-4	100	100	100	100	100	100	100	100	100	100	100	100	100	100	100	100	100	100	100	100	100	100	100	100	100	100	100	100	100	100
	-3	102.381	100	100	102.439	100	100	100	102.381	98.2143	97.8261	100	102.778	102.439	102.381	102.128	100	102.273	100	100	100	103.571	100	97.2222	100	102.273	105	95.2381	96.5517	100	102.778
	-2	102.381	102.273	93.4783	102.439	100	94.7368	100	104.762	98.2143	95.6522	105	100	102.439	102.381	102.128	100	100	100	100	100	103.571	98.2759	102.778	98.2456	93.1818	102.5	95.2381	100	96.5517	97.2222
	-1	80.9524	81.8182	45.6522	80.4878	62.963	55.2632	85.4545	100	85.7143	89.1304	97.5	80.5556	80.4878	95.2381	95.7447	65.7895	106.818	82.9787	90.625	76.4706	92.8571	81.0345	88.8889	78.9474	40.9091	70	57.1429	65.5172	74.1379	69.4444
	0	47.6191	27.2727	32.6087	19.5122	18.5185	47.3684	58.1818	90.4762	71.4286	73.913	67.5	69.4444	19.5122	78.5714	91.4894	52.6316	77.2727	68.0851	42.1875	47.0588	33.9286	46.5517	55.5556	52.6316	38.6364	32.5	19.0476	10.3448	36.2069	52.7778
	1	26.1905	4.54545	21.7391	9.7561	7.40741	26.3158	45.4545	83.3333	75	78.2609	70	69.4444	9.7561	71.4286	82.9787	55.2632	77.2727	68.0851	37.5	32.3529	23.2143	36.2069	50	38.5965	22.7273	22.5	14.2857	10.3448	32.7586	36.1111
SNP		Control						Model						Coptisine 3mg/kg						Coptisine 10mg/kg						Coptisine 30mg/kg
	-4	100	100	100	100	100	100	100	100	100	100	100	100	100	100	100	100	100	100	100	100	100	100	100	100	100	100	100	100	100	100
	-3	101.724	101.961	101.538	98	101.961	101.493	100	102.105	101.449	101.587	101.724	103.659	90.3846	101.37	100	100	101.724	107.895	100	103.03	101.37	100	100	101.389	95	100	96.9697	94.8718	101.333	97.5
	-2	93.1034	90.1961	101.538	90	90.1961	101.493	91.6667	96.8421	98.5507	100	100	101.219	76.9231	82.1918	69.8413	92.3077	100	86.8421	83.0986	84.8485	93.1507	87.6712	100	98.6111	85	93.3333	78.7879	92.3077	101.333	97.5
	-1	43.1035	47.0588	76.9231	50	47.0588	76.1194	55	53.6842	69.5652	77.7778	77.5862	71.9512	35.3846	26.0274	19.0476	48.0769	58.6207	34.2105	21.1268	18.1818	49.3151	32.8767	68.254	68.0556	23.3333	45	21.2121	61.5385	65.3333	65
	0	1.72414	1.96078	7.69231	2	1.96078	11.9403	3.33333	3.15789	4.34783	12.6984	17.2414	7.31707	1.92308	2.73973	0	7.69231	1.72414	5.26316	2.8169	5.15152	0	2.73973	9.52381	13.8889	1.66667	3.33333	6.06061	2.5641	8	10
[truncated: 2 more columns]

## Sheet: Fig 7
NaF		vehicle			coptisine
	0	0	0	0	0	0	0
	5	5	2.77778	-8.53659	1.23457	0	-2.5
	10	-1.25	-6.94444	-12.1951	20.9876	23.3333	27.5
	20	0	0	-9.7561	51.8518	51.6667	55
	30	5	2.77778	-6.09756	77.7778	73.3333	75
	40	12.5	8.33333	1.21951	90.1235	83.3333	87.5
	50	18.75	12.5	7.31707	96.2963	85	85
Time		vehicle			coptisine 5μmol·L-1			20			50
	0	0	0	0	0	0	0	0	0	0	0	0	0
	5	6.66667	4.44444	16.5354	41.1215	0	0.892857	1.42857	0	-1.66667	-0.943396	0.840336	0
	10	105.556	106.667	104.724	114.953	56.4103	60.7143	44.2857	2.06186	6.66667	-0.943396	1.68067	1.44928
	15	134.444	130.37	129.921	134.579	82.0513	124.107	81.4286	4.12371	30	0.943396	1.68067	1.44928
	20	136.667	139.259	137.008	140.187	115.385	141.071	82.8571	10.3093	47.5	2.83019	4.20168	2.89855
	25	134.444	139.259	137.795	137.383	136.752	150	75.7143	18.5567	44.1667	1.88679	7.56302	1.44928
	30	126.667	134.074	135.433	131.776	147.863	150	70	22.6804	40	0.943396	8.40336	0
	35	120	129.63	131.496	122.43	151.282	145.536	60	29.8969	40.8333	0.943396	10.084	1.44928
	40	114.444	123.704	129.134	118.692	151.282	138.393	50	43.299	40	0.943396	15.126	2.89855
p-MYPT1	0.916298	1.80839	1.18602	1.16209	1.01412
	1.01059	1.23227	1.19401	1.27125	1.12339
	1.07312	1.67368	1.29021	1.28139	0.96624
	1.13239	1.22764	1.39409	1.22939	1.10339
P-ERM	0.834694	1.32123	1.04595	0.84764	0.897438
	1.18489	1.46807	1.06461	0.864652	0.753322
	0.980412	1.21103	1.2526	1.08457	1.07801
P-MLC	1.16974	1.38592	1.30883	1.07968	0.929524
	0.8327	1.31708	1.1281	1.35214	0.859794
	0.687873	1.28472	1.50383	1.26733	0.935236
	1.30969	1.44177	1.61271	1.5472	1.24641
